# Supplementary material for: Guanidine Alkaloids from the Marine Sponge Monanchora pulchra Show Cytotoxic Properties and Prevent EGF-Induced Neoplastic Transformation in Vitro
Source: PubMed Central journal article supplement (PMC4962023; doi:10.3390/md14070133), 2016-07-15
Supplement: marinedrugs-14-00133-s001.pdf [file marinedrugs-14-00133-s001.pdf]

## Supplementary Material: Guanidine Alkaloids from the Marine Sponge *Monanchora pulchra* Show Cytotoxic Properties and Prevent EGF-Induced Neoplastic Transformation in Vitro

Sergey A. Dyshlovoy, Kseniya M. Tabakmakher, Jessica Hauschild, Regina K. Shchekaleva, Katharina Otte, Alla G. Guzii, Tatyana N. Makarieva, Ekaterina K. Kudryashova, Sergey N. Fedorov, Larisa K. Shubina, Carsten Bokemeyer, Friedemann Honecker, Valentin A. Stonik and Gunhild von Amsberg

The effect of SP600125 (specific JNK1/2 inhibitor) on the survival of JB6 P+ Cl41 cells treated with compounds 1–8. Cells were co-treated with indicated concentrations of the individual drugs or their combination for 48 h. Cell viability was measured by the MTT assay and the combinational index (CI) values were calculated with CompuSyn software using Chou-Talalay method. Mc-A, monanchocidin A (1); Mc-B, monanchocidin B (2), Mm-C, monanchomycalin C (3); Pt-A, ptilomycalin A (4); Mm-B, monanchomycalin B (5); nMc-D, normonanchocidin D (6); Ur-A, urupocidin A (7); Pch-A, pulchranin A (8). The effect of the treatments vary from 0 (all cells are alive) to 1 (all cells are dead).

| Dose Mc-A, $\mu\text{M}$ | Dose SP600125, $\mu\text{M}$ | Effect | CI      |
|--------------------------|------------------------------|--------|---------|
| 0.25                     | 20.0                         | 0.155  | 2.34884 |
| 0.5                      | 20.0                         | 0.345  | 1.45284 |
| 1.0                      | 20.0                         | 0.573  | 1.48387 |
| 0.25                     | 40.0                         | 0.307  | 1.98479 |
| 0.5                      | 40.0                         | 0.45   | 1.57143 |

| Dose Mc-B, $\mu\text{M}$ | Dose SP600125, $\mu\text{M}$ | Effect | CI      |
|--------------------------|------------------------------|--------|---------|
| 0.75                     | 20.0                         | 0.47   | 1.83752 |
| 1.5                      | 20.0                         | 0.638  | 1.72573 |
| 3.0                      | 20.0                         | 0.693  | 2.57508 |
| 0.75                     | 40.0                         | 0.589  | 1.4313  |
| 1.5                      | 40.0                         | 0.656  | 1.79942 |
| 3.0                      | 40.0                         | 0.749  | 2.11484 |

| Dose Mm-C, $\mu\text{M}$ | Dose SP600125, $\mu\text{M}$ | Effect | CI      |
|--------------------------|------------------------------|--------|---------|
| 0.75                     | 20.0                         | 0.28   | 3.4779  |
| 1.5                      | 20.0                         | 0.583  | 1.13072 |
| 3.0                      | 20.0                         | 0.678  | 1.15795 |
| 6.0                      | 20.0                         | 0.719  | 1.64088 |
| 0.75                     | 40.0                         | 0.407  | 2.20717 |
| 1.5                      | 40.0                         | 0.629  | 1.10073 |
| 3.0                      | 40.0                         | 0.658  | 1.49944 |
| 6.0                      | 40.0                         | 0.691  | 2.1381  |

| Dose Pt-A, $\mu\text{M}$ | Dose SP600125, $\mu\text{M}$ | Effect | CI      |
|--------------------------|------------------------------|--------|---------|
| 0.5                      | 20.0                         | 0.304  | 3.3885  |
| 1.0                      | 20.0                         | 0.559  | 1.30904 |
| 2.0                      | 20.0                         | 0.676  | 1.13367 |
| 4.0                      | 20.0                         | 0.658  | 2.35328 |
| 0.5                      | 40.0                         | 0.477  | 1.63314 |
| 1.0                      | 40.0                         | 0.63   | 1.08641 |
| 2.0                      | 40.0                         | 0.681  | 1.27275 |

| Dose Mm-B, $\mu\text{M}$ | Dose SP600125, $\mu\text{M}$ | Effect | CI      |
|--------------------------|------------------------------|--------|---------|
| 0.375                    | 20.0                         | 0.293  | 1.52167 |
| 0.75                     | 20.0                         | 0.367  | 1.47834 |
| 1.5                      | 20.0                         | 0.448  | 1.55816 |
| 3.0                      | 20.0                         | 0.461  | 2.63426 |
| 0.375                    | 40.0                         | 0.251  | 2.91645 |
| 0.75                     | 40.0                         | 0.326  | 2.45096 |
| 1.5                      | 40.0                         | 0.457  | 1.73874 |
| 3.0                      | 40.0                         | 0.461  | 2.88906 |
| 0.75                     | 20.0                         | 0.343  | 2.36287 |
| 1.5                      | 20.0                         | 0.464  | 1.48077 |
| 3.0                      | 20.0                         | 0.512  | 1.87456 |
| 6.0                      | 20.0                         | 0.687  | 0.77791 |
| 0.75                     | 40.0                         | 0.293  | 4.5777  |
| 1.5                      | 40.0                         | 0.45   | 1.84516 |
| 3.0                      | 40.0                         | 0.521  | 1.83676 |

| Dose nMc-D, $\mu\text{M}$ | Dose SP600125, $\mu\text{M}$ | Effect | CI      |
|---------------------------|------------------------------|--------|---------|
| 0.625                     | 20.0                         | 0.287  | 2.29674 |
| 1.25                      | 20.0                         | 0.42   | 1.79187 |
| 2.5                       | 20.0                         | 0.454  | 2.69936 |
| 5.0                       | 20.0                         | 0.678  | 1.43814 |
| 0.625                     | 40.0                         | 0.384  | 1.67978 |
| 1.25                      | 40.0                         | 0.433  | 1.97571 |
| 2.5                       | 40.0                         | 0.469  | 2.74596 |
| 5.0                       | 40.0                         | 0.767  | 0.83689 |
| 1.25                      | 20.0                         | 0.492  | 1.88748 |
| 2.5                       | 40.0                         | 0.493  | 3.74941 |
| 1.25                      | 40.0                         | 0.543  | 1.51716 |
| 2.5                       | 40.0                         | 0.545  | 2.63287 |

| Dose Ur-A, $\mu\text{M}$ | Dose SP600125, $\mu\text{M}$ | Effect | CI      |
|--------------------------|------------------------------|--------|---------|
| 3.125                    | 20.0                         | 0.283  | 0.92335 |
| 6.25                     | 20.0                         | 0.339  | 0.8535  |
| 12.5                     | 20.0                         | 0.397  | 0.86526 |
| 25.0                     | 20.0                         | 0.434  | 1.09976 |
| 3.125                    | 40.0                         | 0.352  | 1.00969 |
| 6.25                     | 40.0                         | 0.441  | 0.7273  |
| 12.5                     | 40.0                         | 0.483  | 0.72863 |
| 25.0                     | 40.0                         | 0.528  | 0.782   |
| 6.25                     | 20.0                         | 0.36   | 1.0469  |
| 12.5                     | 20.0                         | 0.435  | 0.93691 |
| 25.0                     | 20.0                         | 0.509  | 0.92798 |
| 50.0                     | 20.0                         | 0.527  | 1.47783 |
| 6.25                     | 40.0                         | 0.427  | 0.91371 |
| 12.5                     | 40.0                         | 0.515  | 0.6809  |
| 25.0                     | 40.0                         | 0.554  | 0.78736 |

| Dose Pch-A, $\mu\text{M}$ | Dose SP600125, $\mu\text{M}$ | Effect | CI      |
|---------------------------|------------------------------|--------|---------|
| 12.5                      | 20.0                         | 0.406  | 1.32739 |
| 25.0                      | 20.0                         | 0.429  | 1.9124  |
| 50.0                      | 20.0                         | 0.537  | 1.99839 |
| 12.5                      | 40.0                         | 0.459  | 1.46527 |
| 25.0                      | 40.0                         | 0.524  | 1.55852 |
| 50.0                      | 40.0                         | 0.586  | 1.83779 |
